# Supplementary material for: GlSwi6 Positively Regulates Cellulase and Xylanase Activities through Intracellular Ca2+ Signaling in Ganoderma lucidum
Source: MDPI journal article supplement (doi:10.3390/jof8020187), 2022-02-14
Supplement: s1 [file s1]

1 **Supplementary information**

2

3 **GISwi6 is involved in the regulation of cellulase and xylanase activities through intracellular Ca<sup>2+</sup>**  
4 **signaling in *Ganoderma lucidum***

5 Ling-Dan Lian,<sup>1</sup> Ling-Yan Shi,<sup>1</sup> Jing Zhu,<sup>1</sup> Rui Liu,<sup>1</sup> Liang Shi,<sup>1</sup> Ang Ren,<sup>1</sup> Han-Shou Yu<sup>1</sup> and Min-Wen  
6 Zhao<sup>1\*</sup>

7

8 **Affiliation:**

9 <sup>1</sup>Key Laboratory of Agricultural Environmental Microbiology, Ministry of Agriculture, Microbiology  
10 Department, College of Life Sciences, Nanjing Agricultural University, Nanjing, Jiangsu, 210095, China.

11

12 \*Corresponding author. Mailing address: College of Life Sciences, Nanjing Agricultural University;  
13 No.1 Weigang, Nanjing 210095, Jiangsu, People's Republic of China.

14 Telephone and Fax: 0086-25-84395602.

15 E-mail: mwzhao@njau.edu.cn

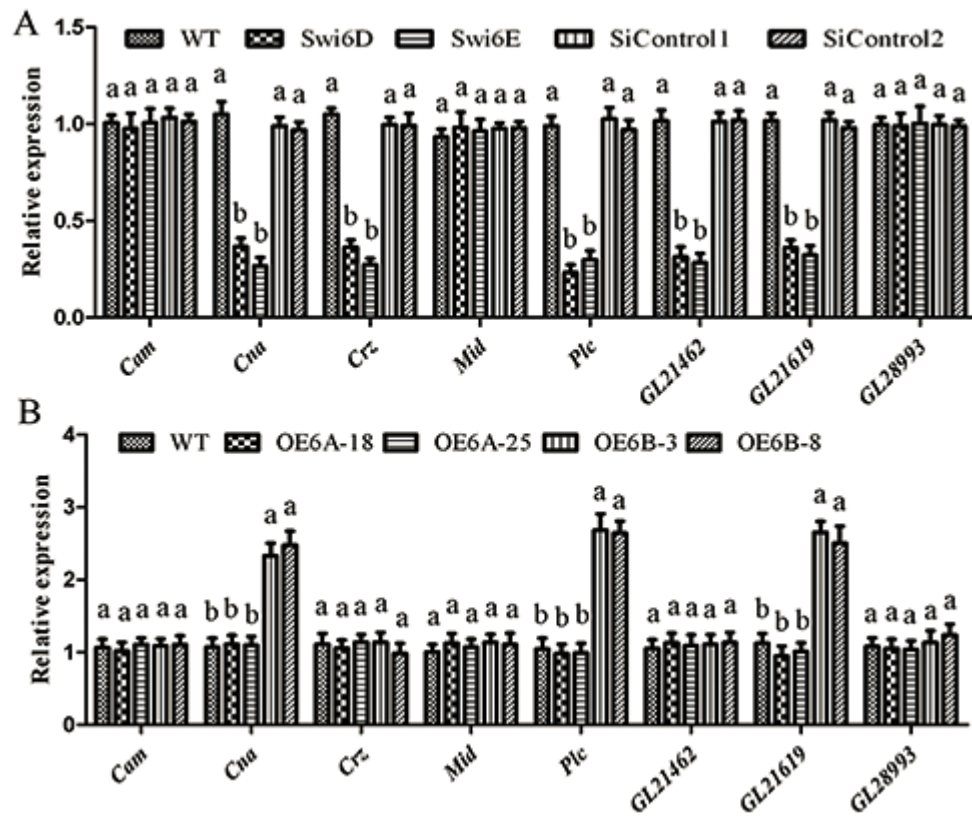

**Fig.S1  $GfSwi6$  regulated the expression of genes involved in  $\text{Ca}^{2+}$  signal.** (A) The expression of genes involved in  $\text{Ca}^{2+}$  signal in  $GfSwi6$  silenced strains. (B) The expression of genes involved in  $\text{Ca}^{2+}$  signal in  $GfSwi6$  overexpression strains. The values are the mean  $\pm$  SE ( $n=3$ ). Different letters indicate significant differences between the strains ( $P < 0.05$ , Tukey's test).

Table S1 Primers used in this study

| Primer      | Sequence (5'to 3')    | Description                   |
|-------------|-----------------------|-------------------------------|
| RT-CBH1-F   | ACGCTCACCACCGAGAC     | Detects the CBH1 expression   |
| RT-CBH1-R   | CGTAGTCAGCACCATCCAG   |                               |
| RT-CBH2-F   | ACTGGACTGGCTCTGCTAACG | Detects the CBH2 expression   |
| RT-CBH2-R   | ATCGCAGCCGTCCTTGTCG   |                               |
| RT-CBH3-F   | GCTTTGCCCTGACCCTGTC   | Detects the CBH3expression    |
| RT-CBH3-R   | CGTAGGTGGTGTATCCTGTGA |                               |
| RT-CBH4-F   | CGCGTCTGGCTCAGTTTG    | Detects the CBH4 expression   |
| RT-CBH4-R   | CAGCGTAGTATGGGCTCAAGT |                               |
| RT-EG1-F    | CTCCGTCCAATTTGTCGT    | Detects the EG1 expression    |
| RT-EG1-R    | GTTCCACTGTTGTCGCTGT   |                               |
| RT-EG2-F    | ACGGTTCAATGGCGAGATAA  | Detects the EG2 expression    |
| RT-EG2-R    | CGCACCTGCTTGACGAAT    |                               |
| RT-EG3-F    | CACCGACTCACTCACCTCA   | Detects the EG3 expression    |
| RT-EG3-R    | CGCGGACACCGTTCACA     |                               |
| RT-EG4-F    | GTTCTCGCTTTGTCAG      | Detects the EG4 expression    |
| RT-EG4-R    | CACGAATTCAGGGTCGC     |                               |
| RT-Bgl2-F   | ACATCTCTCTCCCGAC      | Detects the Bgl2 expression   |
| RT-Bgl2-R   | TATCCACACTGCTCCTG     |                               |
| RT-Xln1-F   | GCAGACGCCTTGTTAGC     | Detects the Xln1 expression   |
| RT-Xln1-R   | AGCCTCGGGAGTGTTGA     |                               |
| RT-Xln2-F   | CTCCCCCTCACAACAC      | Detects the Xln2 expression   |
| RT-Xln2-R   | CATACAAGGACGACAAAA    |                               |
| RT-Xln3-F   | GAACGCTGATGTTTGGC     | Detects the Xln3 expression   |
| RT-Xln3-R   | CCTTCCGTCTCTGTCTC     |                               |
| RT-Xln4-F   | GCTTATCGACGCCATCG     | Detects the Xln4expression    |
| RT-Xln4-R   | TCACGCACACCCCAACT     |                               |
| RT-Xln5-F   | CCAGTGCCACTTCATCG     | Detects the Xln5 expression   |
| RT-Xln5-R   | ATACCCACACACCCCC      |                               |
| RT-Xln6-F   | ACATGCGCGAGTTCGTG     | Detects the Xln6 expression   |
| RT-Xln6-R   | AAGGTGCTGGGGACAAA     |                               |
| RT-XlnR-1-F | GGGCTCCATCGATCTTAC    | Detects the XlnR-1 expression |
| RT-XlnR-1-R | CCTTGCGCTTATTCTTGT    |                               |
| RT-XlnR-2-F | CCCCACTCGCCTCTTGAC    | Detects the XlnR-2 expression |
| RT-XlnR-2-R | AGCCGGAGCACTTTGCCT    |                               |
| RT-ClrB-1-F | CGTCACATCTGCGTCTA     | Detects the ClrB-1 expression |
| RT-ClrB-1-R | TTCCGTACTGATCTTGG     |                               |
| RT-ClrB-2-F | CCAGAAGAATGGGAAGTC    | Detects the ClrB-2 expression |
| RT-ClrB-2-R | GGATATGAGGTTGGTGAG    |                               |
| RT-CreA-F   | GACATTCCCGCATACACA    | Detects the CreA expression   |
| RT-CreA-R   | GCTCCTAGCCTTCTTCTTA   |                               |
| RT-Ace1-F   | GGGCTATACGACTTTCGG    | Detects the Ace1 expression   |

|              |                        |                                              |
|--------------|------------------------|----------------------------------------------|
| RT-Ace1-R    | ATTGGGGTCTATGCTGGG     |                                              |
| RT-AmyR-F    | CCAGCCCAAGAAGAGAGG     | Detects the AmyR expression                  |
| RT-AmyR-R    | GGGAGAGCCGAAACAGAC     |                                              |
| RT-Cam-F     | CCCCGAGTTCCTGACGATG    | Detects the Cam expression                   |
| RT-Cam-R     | AGCTTCTCGCCGAGGTTGG    |                                              |
| RT-Cna-F     | AGGAGGCTATCTCTGGTTTCG  | Detects the Cna expression                   |
| RT-Cna-R     | TCTTCTGCTGGCGTTGTCG    |                                              |
| RT-Crz-F     | ACGCCCCCTTCCTATGCGAGTG | Detects the Crz expression                   |
| RT-Crz-R     | AGGAAACGGCGTCAGTAGC    |                                              |
| RT-Mid-F     | CAACTTGTCCTTGCCATCAC   | Detects the Mid expression                   |
| RT-Mid-R     | GCCAGCCATCCGTATTCTT    |                                              |
| RT-Plc-F     | CAACTTTGACGACGTAGAGC   | Detects the Plc expression                   |
| RT-Plc-R     | GGCGTGCCTTGAGGGACTT    |                                              |
| RT-GL21462-F | TGTCACCCACGAACCCTTAT   | Detects the Ca <sup>2+</sup> pump expression |
| RT-GL21462-R | GGAGGACCTTTGCTAGACG    |                                              |
| RT-GL21619-F | TGACGAAGAACGAGCAGAC    | Detects the Ca <sup>2+</sup> pump expression |
| RT-GL21619-R | TGTTGCAGACCGAGCCTATC   |                                              |
| RT-GL28993-F | CGCGAATGTCCTCCCTACT    | Detects the Ca <sup>2+</sup> pump expression |
| RT-GL28993-R | GCAACACCTTCCACCCAAT    |                                              |

---
